# Supplementary material
Source: ML conference proceedings conference paper supplement (https://openreview.net/forum?id=USMgLvZk1X)
Supplement: supplementary_material [file result_report_generation.pdf › mpLLM/RadFM/Images/result_report_generation.pdf]

Qualitative example of report generation task

Input Prompt

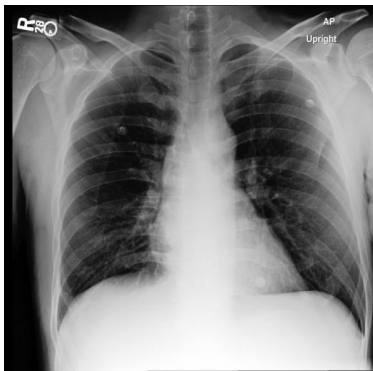

Please generate a radiology report for this scan  
<image-1>

Reference Report

Findings: The lungs are clear without focal consolidation. No pleural effusion or pneumothorax is seen. The cardiac and mediastinal silhouettes are unremarkable.  
Impression: No acute cardiopulmonary process.

RadFM Prediction

Findings : The lungs are clear without focal consolidation. No pleural effusion or pneumothorax is seen. The cardiac and mediastinal silhouettes are unremarkable.  
Impression: No acute cardiopulmonary process

Input Prompt

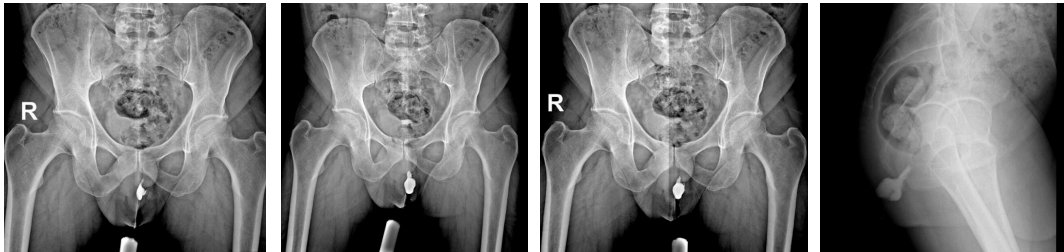

<image-1> <image-2> <image-3> <image-4>

<image-1> <image-2> Patient Data Age: 40 years  
Gender: Male Perianal purulent discharge and tenderness. Please caption this scan with finding and impression. <image-3> <image-4>

Reference Report

'Finding: Injection of contrast via the orifice of purulent discharge showed opacification of the left perianal abscess.  
No evidence of obvious contrast extravasation into the anal canal or rectum.  
Impression: Left perianal abscess with no evidence of contrast extravasation into the anal canal or rectum

RadFM Prediction

Findings : The lungs are clear without focal consolidation. No pleural effusion or pneumothorax is seen. The cardiac and mediastinal silhouettes are unremarkable.  
Impression: No acute cardiopulmonary process

Input Prompt

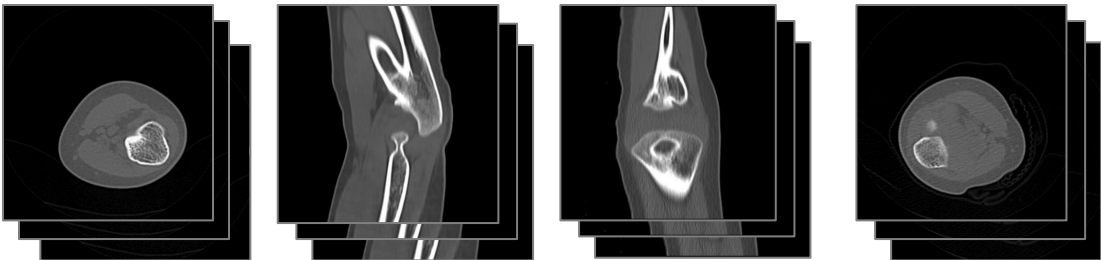

<image-1> <image-2> <image-3> <image-4>

Patient Data Age: 4 years Gender: Male Both forearms are Fixed in a pronated position since birth. Describe the finding and impression of the medical image you see.  
. <image-1> <image-2> <image-3> <image-4>

Reference Report

'Finding: Injection of contrast via the orifice of purulent discharge showed opacification of the left perianal abscess.  
No evidence of obvious contrast extravasation into the anal canal or rectum.  
Impression: Left perianal abscess with no evidence of contrast extravasation into the anal canal or rectum

RadFM Prediction

Findings : The lungs are clear without focal consolidation. No pleural effusion or pneumothorax is seen. The cardiac and mediastinal silhouettes are unremarkable.  
Impression: No acute cardiopulmonary process

Input Prompt

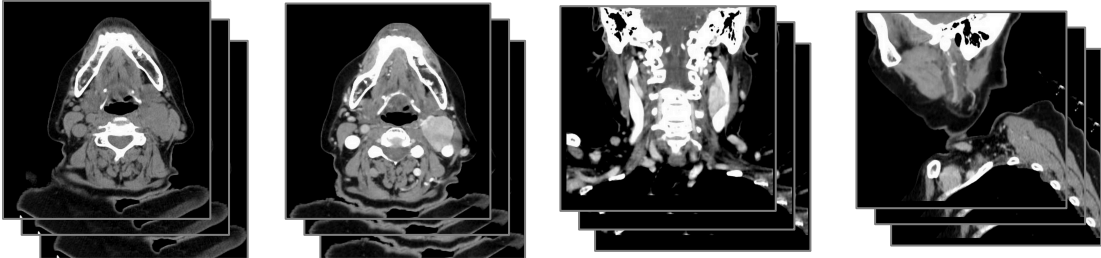

<image-1> <image-2> <image-3> <image-4>

Patient Data Age: Patient Data Age: 65 years  
Gender: Female Painless mass of the left upper neck. Please caption this scan with finding and impression.  
. <image-1> <image-2> <image-3> <image-4>

Reference Report

Findings: Well-circumscribed vividly enhancing left upper cervical mass in the carotid space, splaying the internal and external carotid arteries (lyre sign).

RadFM Prediction

[Finding: A large well-defined vividly enhancing soft tissue mass of the left carotid space splaying the internal and external carotid arteries (the lyre sign), isodense to the muscles.  
Impression: Large well-defined vividly enhancing soft tissue mass of the left carotid space, splaying the internal and external carotid arteries
